# Supplementary material for: Dragonfly Conservation in the Increasingly Stressed African Mediterranean-Type Ecosystems
Source: Frontiers journal article supplement (doi:10.3389/fenvs.2021.660163), 2021-08-05
Supplement: Image_1.pdf [file Image_1.pdf]

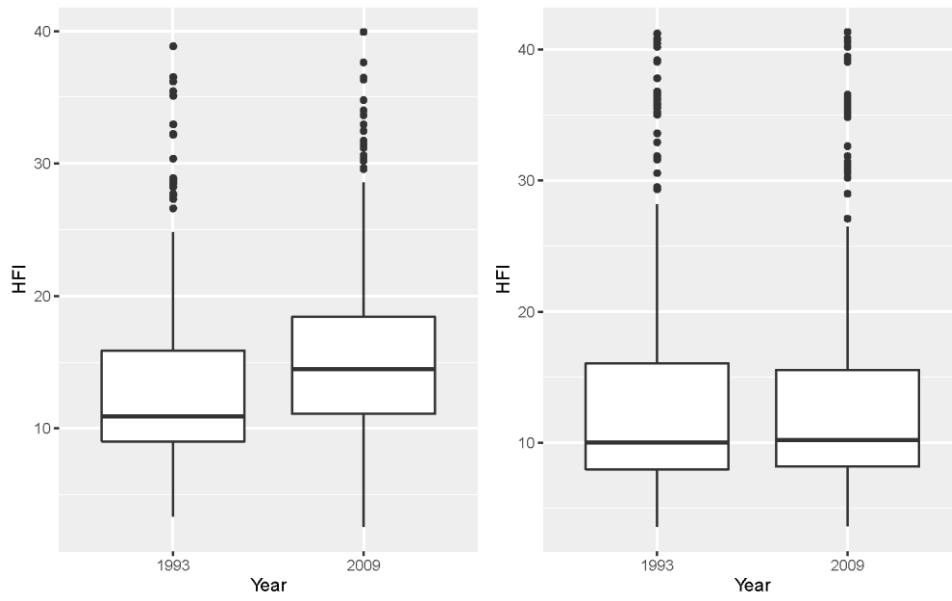

**Figure S1.** Change in Human Footprint Index (HFI) around major lakes of North (NAR) (a) and South (SAR) (b) African regions. HFI ranges from 0 (no human influence) to 50 (very high human influence).
