# Supplementary material for: Dragonfly Conservation in the Increasingly Stressed African Mediterranean-Type Ecosystems
Source: Frontiers journal article supplement (doi:10.3389/fenvs.2021.660163), 2021-08-05
Supplement: Image_2.pdf [file Image_2.pdf]

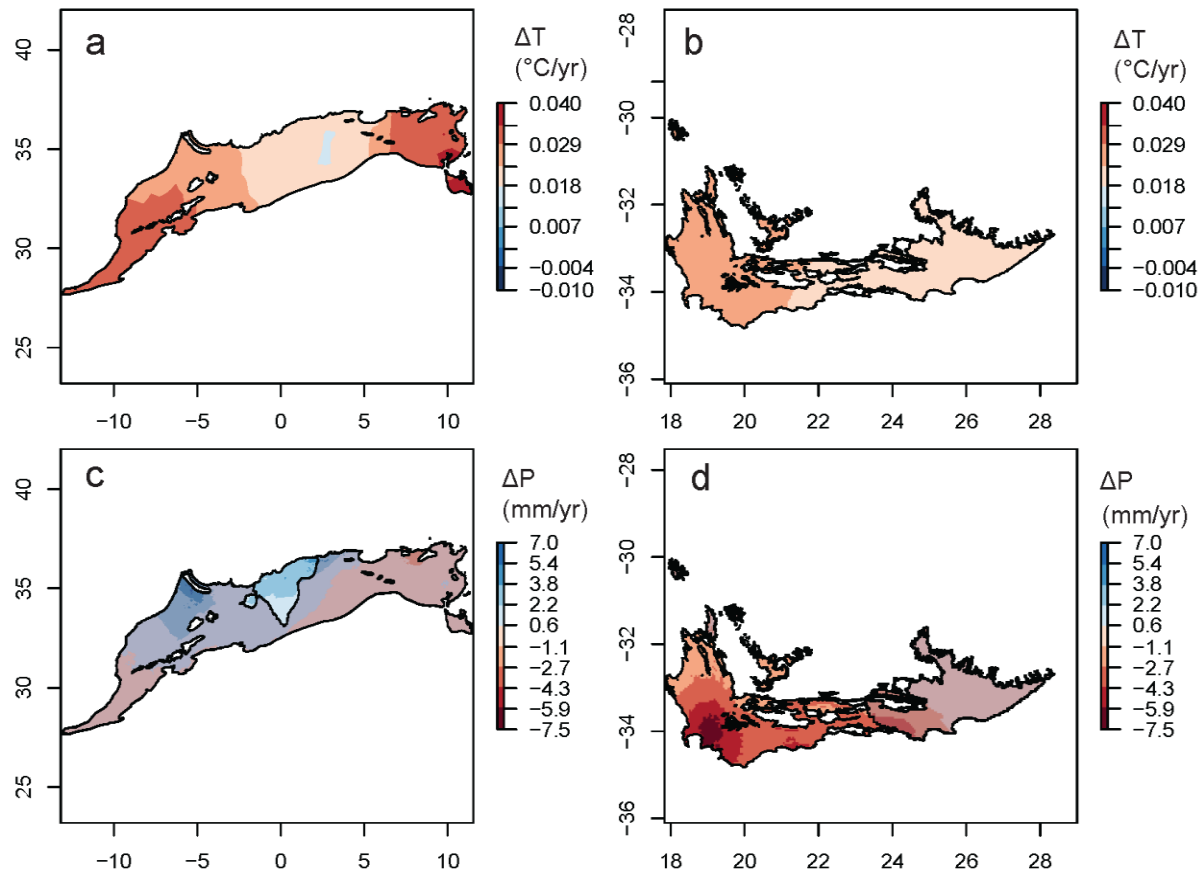

**Figure S2.** Temporal trend of the average annual temperature ( $\Delta T$ ) and annual precipitation ( $\Delta P$ ) between 1980 and 2018 in North African (NAR) and South African regions (SAR). (a)  $\Delta T$  in NAR and (b)  $\Delta T$  in SAR. (c)  $\Delta P$  in NAR and (d)  $\Delta P$  in SAR. Data obtained from WorldClim v2. The shaded polygons indicate non-significant trends.
