# Supplementary material for: Dragonfly Conservation in the Increasingly Stressed African Mediterranean-Type Ecosystems
Source: Frontiers journal article supplement (doi:10.3389/fenvs.2021.660163), 2021-08-05
Supplement: Table_1.docx [file Table_1.docx]

Table S1. List of studies used for the calculation of Dragonfly Biotic Index in Northern African region.

| Country | Reference |
| --- | --- |
| Algeria | Bouchelouche, D., Kherbouche-Abrous, O., Mebarki, M., Arab, A., & Samraoui, B. (2015). The Odonata of Wadi Isser (Kabylia, Algeria): Status and environmental determinants of their distribution. *Revue d'Ecologie*70, 248-260. |
|  | Chelli, A. M., & Moulaï, R. Diversity and ecological diagnosis of dragonflies of high-mountain temporary ponds in the Akfadou massif forest (Algeria). Zoology and Ecology 29(1), 28-37 |
|  | Chelli, A., & Moulaï, R. (2019). Ecological characterization of the odonatofauna in lotic and lentic waters of northeast Algeria. In *Annales de la Société entomologique de France (NS)* 55, 430-445 |
|  | Demnati, F., Allache, F., & Cohez, D. (2019). Contribution A La Connaissance De L’odonatofaune Du Bassin Du Chott Melghir (Algérie). *Bull. Soc. Zool. Fr*, *144*(2), 95-104. |
|  | Yalles Satha, A., & Samraoui, B. (2017). Environmental factors influencing Odonata communities of three mediterranean rivers: Kebir-east, Seybouse, and Rhumel wadis, northeastern Algeria. *Revue d'écologie*72: 314-329. |
|  | Senouci, H., & Bounaceur, F. (2018). Contribution to the study of diversity and abundance of odonates in some wet biotopes in Tiaret region, Algeria. *Plant Archives*, *18*(1), 555-560. |
|  | Khelifa, R. (2019). Sensitivity of biodiversity indices to life history stage, habitat type and landscape in Odonata community. *Biological Conservation*, *237*, 63-69. |
|  | Khelifa, R., Mellal, M. K., Zouaimia, A., Amari, H., Zebsa, R., Bensouilah, S., ... & Houhamdi, M. (2016). On the restoration of the last relict population of a dragonfly Urothemis edwardsii Selys (Libellulidae: Odonata) in the Mediterranean. *Journal of insect conservation*, *20*(5), 797-805. |
| Morocco | El Haissoufi, M., Bennas, N., El Mohdi, O., & Millán, A. (2010). Analyse préliminaire de la vulnérabilité des Odonates (Odonata) du Rif Occidental (Nord du Maroc). *Boletín de la Sociedad entomológica aragonesa*, *46*, 345-354. |
|  | El Haissoufi, M., Lmohdi, O., Bennas, N., Mellado, A., & Millan, A. (2008). Les Odonates du bassin versant Laou (Rif occidental, Maroc). *Trav. Instit. Scient. Rabat*, 5, 47-59. |
|  | Juillerat, L., & Monnerat, C. (2009). Odonata in southern Morocco, with first records of Orthetrum ransonnetii and Sympetrum sinaiticum (Odonata: Libellulidae). *Libellula*, *28*, 97-115. |
|  | Taybi, A. F., Mabrouki, Y., Berrahou, A., Sbaa, M., & Brochard, C. (2019). New data on the dragonfly fauna (Odonata) of the Moulouya River Basin and the Oriental Region, Morocco. *Arxius de Miscel· lània Zoològica*, *17*, 85-108. |
| Tunisia | Korbaa, M., Ferreras-Romero, M., Ruiz-García, A., & Boumaiza, M. (2018). TSOI− a new index based on Odonata populations to assess the conservation relevance of watercourses in Tunisia. *Odonatologica*, *47*(1/2), 43-72. |
|  | Sellami, E. L., Meurgey, F., Barbouche, N., & Romdhane, M. S. (2015). Odonates dans les principaux cours d’eau du parc national de l’Ichkeul (Tunisie). *Entomologie faunistique-Faunistic Entomology* 68, 93-100 |
|  | Jödicke, R., Arlt, J., Kunz, B., Lopau, W., & Seidenbusch, R. (2000). The Odonata of Tunisia. *International journal of Odonatology*, *3*(1), 41-71. |
