# Supplementary material for: Dragonfly Conservation in the Increasingly Stressed African Mediterranean-Type Ecosystems
Source: Frontiers journal article supplement (doi:10.3389/fenvs.2021.660163), 2021-08-05
Supplement: Table_2.docx [file Table_2.docx]

Table S2. Major threats used by the IUCN Red List for the studied odonates in Northern and Southern African region.

| Code | Major threats | Sub-categories |
| --- | --- | --- |
| 1 | Agriculture & aquaculture | Annual & perennial non-timber crops |
|  |  | Wood & pulp plantations |
|  |  | Livestock farming & ranching |
|  |  | Biological resource use |
|  |  | Logging & wood harvesting |
|  |  | Marine & freshwater aquaculture |
| 2 | Biological resource use | Logging & wood harvesting |
| 3 | Climate change & severe weather | Droughts |
|  |  | Habitat shifting & alteration |
|  |  | Temperature extremes |
| 4 | Energy production & mining | Mining & quarrying |
| 5 | Human intrusions & disturbance | Recreational activities |
|  |  | Work & other activities |
| 6 | Invasive and other problematic species, genes & diseases | Invasive non-native/alien species/diseases |
| 7 | Natural system modifications | Other ecosystem modifications |
|  |  | Dams & water management/use |
|  |  | Fire & fire suppression |
| 8 | Pollution | Domestic & urban waste water |
|  |  | Industrial & military effluents |
|  |  | Agricultural & forestry effluents |
| 9 | Residential & commercial development | Housing & urban areas |
|  |  | Commercial & industrial areas |
|  |  | Tourism & recreation areas |
| 10 | Undetermined |  |
