# Supplementary material for: Dragonfly Conservation in the Increasingly Stressed African Mediterranean-Type Ecosystems
Source: Frontiers journal article supplement (doi:10.3389/fenvs.2021.660163), 2021-08-05
Supplement: Table_3.docx [file Table_3.docx]

Table S3. Species list (1=presence, 0=absence) with their global distribution, IUCN Red List status, endemism status and occurrence, and threats in the three assessed countries of the Northern African region. Regionally extinct (RE), Critically Endangered (CR), Endangered (EN), Vulnerable (VU), Near Threatened (NT), Least Concern (LC), Data Deficient (DD), Not Applicable (NA). Details for each threat code are presented in Table S1.

| **Suborder** | **Family** | **Species** | **Endemic** | **RedList status** | **Threat Code** |
| --- | --- | --- | --- | --- | --- |
| Zygoptera | Calopterygidae | *Calopteryx exul* | Yes | EN | 1,8 |
| Zygoptera | Calopterygidae | *Calopteryx haemorrhoidalis* | No | LC | 1,7 |
| Zygoptera | Coenagrionidae | *Ceriagrion tenellum* | No | LC | 10 |
| Zygoptera | Coenagrionidae | *Coenagrion caerulescens* | No | LC | 3,7,8,9 |
| Zygoptera | Coenagrionidae | *Coenagrion mercuriale* | No | NT | 1,3,7,8 |
| Zygoptera | Coenagrionidae | *Coenagrion puella* | No | LC | 1,5,8,9 |
| Zygoptera | Coenagrionidae | *Coenagrion scitulum* | No | LC | 1,3,7,8 |
| Zygoptera | Coenagrionidae | *Enallagma deserti* | Yes | LC | 8 |
| Zygoptera | Coenagrionidae | *Erythromma lindenii* | No | LC | 10 |
| Zygoptera | Coenagrionidae | *Erythromma viridulum* | No | LC | 3,7,8,9 |
| Zygoptera | Coenagrionidae | *Ischnura fountaineae* | No | LC | 1,8 |
| Zygoptera | Coenagrionidae | *Ischnura graellsii* | No | LC | 10 |
| Zygoptera | Coenagrionidae | *Ischnura pumilio* | No | LC | 8 |
| Zygoptera | Coenagrionidae | *Ischnura saharensis* | No | LC | 1,7,8 |
| Zygoptera | Coenagrionidae | *Pseudagrion sublacteum* | No | LC | 1,8 |
| Zygoptera | Coenagrionidae | *Pyrrhosoma nymphula* | No | LC | 10 |
| Zygoptera | Lestidae | *Chalcolestes viridis* | No | LC | 10 |
| Zygoptera | Lestidae | *Lestes barbarus* | No | LC | 3 |
| Zygoptera | Lestidae | *Lestes numidicus* | Yes | DD | 3,8,9 |
| Zygoptera | Lestidae | *Lestes virens* | No | LC | 10 |
| Zygoptera | Lestidae | *Sympecma fusca* | No | LC | 3,7,8 |
| Zygoptera | Platycnemididae | *Platycnemis subdilatata* | Yes | LC | 10 |
| Anisoptera | Aeshnidae | *Aeshna affinis* | No | LC | 1,8,9 |
| Anisoptera | Aeshnidae | *Aeshna cyanea* | No | LC | 3 |
| Anisoptera | Aeshnidae | *Aeshna isoceles* | No | LC | 7 |
| Anisoptera | Aeshnidae | *Aeshna mixta* | No | LC | 10 |
| Anisoptera | Aeshnidae | *Anax imperator* | No | LC | 10 |
| Anisoptera | Aeshnidae | *Anax parthenope* | No | LC | 1,3,7,8,9 |
| Anisoptera | Aeshnidae | *Boyeria irene* | No | LC | 10 |
| Anisoptera | Gomphidae | *Gomphus lucasii* | Yes | VU | 10 |
| Anisoptera | Gomphidae | *Onychogomphus costae* | No | NT | 1,8 |
| Anisoptera | Gomphidae | *Onychogomphus uncatus* | No | LC | 10 |
| Anisoptera | Gomphidae | *Paragomphus genei* | No | LC | 3 |
| Anisoptera | Libellulidae | *Acisoma inflatum* | No | LC | 8,9 |
| Anisoptera | Libellulidae | *Brachythemis impartita* | No | LC | 1,3,7,8,9 |
| Anisoptera | Libellulidae | *Crocothemis erythraea* | No | LC | 10 |
| Anisoptera | Libellulidae | *Diplacodes lefebvrii* | No | LC | 10 |
| Anisoptera | Libellulidae | *Orthetrum brunneum* | No | LC | 3,7 |
| Anisoptera | Libellulidae | *Orthetrum cancellatum* | No | LC | 3,5,7,9 |
| Anisoptera | Libellulidae | *Orthetrum chrysostigma* | No | LC | 10 |
| Anisoptera | Libellulidae | *Orthetrum coerulescens* | No | LC | 10 |
| Anisoptera | Libellulidae | *Orthetrum nitidinerve* | No | NT | 10 |
| Anisoptera | Libellulidae | *Orthetrum trinacria* | No | LC | 1,3,7,8 |
| Anisoptera | Libellulidae | *Selysiothemis nigra* | No | LC | 1,8 |
| Anisoptera | Libellulidae | *Sympetrum fonscolombii* | No | LC | 1,8 |
| Anisoptera | Libellulidae | *Sympetrum meridionale* | No | LC | 10 |
| Anisoptera | Libellulidae | *Sympetrum sanguineum* | No | LC | 10 |
| Anisoptera | Libellulidae | *Sympetrum sinaiticum* | No | LC | 10 |
| Anisoptera | Libellulidae | *Sympetrum striolatum* | No | LC | 1,3,6,7,8,9 |
| Anisoptera | Libellulidae | *Trithemis annulata* | No | LC | 1,8,9 |
| Anisoptera | Libellulidae | *Trithemis arteriosa* | No | LC | 1,2,3,4,7,8 |
| Anisoptera | Libellulidae | *Urothemis edwardsii* | No | LC | 10 |
| Anisoptera | Libellulidae | *Zygonyx torridus* | No | LC | 1,3,7,8 |
