# Supplementary material for: Dragonfly Conservation in the Increasingly Stressed African Mediterranean-Type Ecosystems
Source: Frontiers journal article supplement (doi:10.3389/fenvs.2021.660163), 2021-08-05
Supplement: Table_4.docx [file Table_4.docx]

Table S4. Species list (1=presence, 0=absence) with their global distribution, IUCN redlist status, endemism status and occurrence in the three assessed countries of the Southern African region. BW: Botswana, NA: Namibia, ZA: South Africa. Regionally extinct (RE), Critically Endangered (CR), Endangered (EN), Vulnerable (VU), Near Threatened (NT), Least Concern (LC), Data Deficient (DD), Not Applicable (NA). Details for each threat code are presented in Table S1.

| **Suborder** | **Family** | **Species** | **Endemic** | **RedList status** | **Threat code** |
| --- | --- | --- | --- | --- | --- |
| Zygoptera | Chlorocyphidae | *Platycypha caligata* | No | LC | 1,8 |
| Zygoptera | Chlorocyphidae | *Platycypha fitzsimonsi* | No | LC | 10 |
| Zygoptera | Coenagrionidae | *Africallagma glaucum* | No | LC | 1,7,8 |
| Zygoptera | Coenagrionidae | *Africallagma sapphirinum* | Yes | LC | 10 |
| Zygoptera | Coenagrionidae | *Agriocnemis falcifera* | Yes | LC | 10 |
| Zygoptera | Coenagrionidae | *Azuragrion nigridorsum* | No | LC | 1 |
| Zygoptera | Coenagrionidae | *Ceriagrion glabrum* | No | LC | 10 |
| Zygoptera | Coenagrionidae | *Ischnura senegalensis* | No | LC | 10 |
| Zygoptera | Coenagrionidae | *Proischnura polychromatica* | Yes | VU | 1,6,7 |
| Zygoptera | Coenagrionidae | *Pseudagrion citricola* | Yes | LC | 10 |
| Zygoptera | Coenagrionidae | *Pseudagrion draconis* | Yes | LC | 10 |
| Zygoptera | Coenagrionidae | *Pseudagrion furcigerum* | Yes | LC | 10 |
| Zygoptera | Coenagrionidae | *Pseudagrion hageni* | No | LC | 1,2,7,8 |
| Zygoptera | Coenagrionidae | *Pseudagrion kersteni* | No | LC | 10 |
| Zygoptera | Coenagrionidae | *Pseudagrion massaicum* | No | LC | 1,7,8 |
| Zygoptera | Coenagrionidae | *Pseudagrion salisburyense* | No | LC | 10 |
| Zygoptera | Coenagrionidae | *Pseudagrion spernatum* | No | LC | 7,8 |
| Zygoptera | Lestidae | *Lestes pallidus* | No | LC | 10 |
| Zygoptera | Lestidae | *Lestes plagiatus* | No | LC | 1,7,8 |
| Zygoptera | Lestidae | *Lestes virgatus* | No | LC | 1,2,7,8 |
| Zygoptera | Platycnemididae | *Allocnemis leucosticta* | Yes | LC | 10 |
| Zygoptera | Platycnemididae | *Elattoneura glauca* | No | LC | 1,2,8 |
| Zygoptera | Platycnemididae | *Spesbona angusta* | Yes | EN | 1,6,7 |
| Zygoptera | Synlestidae | *Chlorolestes conspicuus* | Yes | LC | 10 |
| Zygoptera | Synlestidae | *Chlorolestes fasciatus* | Yes | LC | 10 |
| Zygoptera | Synlestidae | *Chlorolestes tessellatus* | Yes | LC | 10 |
| Zygoptera | Synlestidae | *Chlorolestes umbratus* | Yes | LC | 1,2,6 |
| Zygoptera | Synlestidae | *Ecchlorolestes nylephtha* | Yes | NT | 2 |
| Zygoptera | Synlestidae | *Ecchlorolestes peringueyi* | Yes | NT | 1,6 |
| Anisoptera | Aeshnidae | *Anax imperator* | No | LC | 10 |
| Anisoptera | Aeshnidae | *Anax speratus* | No | LC | 10 |
| Anisoptera | Aeshnidae | *Pinheyschna subpupillata* | No | LC | 10 |
| Anisoptera | Aeshnidae | *Zosteraeschna minuscula* | No | LC | 7,9 |
| Anisoptera | Corduliidae | *Syncordulia gracilis* | Yes | VU | 1,6,8 |
| Anisoptera | Corduliidae | *Syncordulia legator* | Yes | VU | 6,7 |
| Anisoptera | Corduliidae | *Syncordulia serendipator* | Yes | VU | 6,7 |
| Anisoptera | Corduliidae | *Syncordulia venator* | Yes | VU | 1,6,8 |
| Anisoptera | Gomphidae | *Ceratogomphus pictus* | No | LC | 10 |
| Anisoptera | Gomphidae | *Ceratogomphus triceraticus* | Yes | NT | 1,6,7,8 |
| Anisoptera | Gomphidae | *Paragomphus cognatus* | No | LC | 1,7,8 |
| Anisoptera | Gomphidae | *Paragomphus elpidius* | No | LC | 1,7,8 |
| Anisoptera | Gomphidae | *Paragomphus genei* | No | LC | 1,3,7,8 |
| Anisoptera | Libellulidae | *Crocothemis erythraea* | No | LC | 10 |
| Anisoptera | Libellulidae | *Crocothemis sanguinolenta* | No | LC | 10 |
| Anisoptera | Libellulidae | *Diplacodes lefebvrii* | No | LC | 10 |
| Anisoptera | Libellulidae | *Nesciothemis farinosa* | No | LC | 10 |
| Anisoptera | Libellulidae | *Orthetrum abbotti* | No | LC | 1,7 |
| Anisoptera | Libellulidae | *Orthetrum caffrum* | No | LC | 10 |
| Anisoptera | Libellulidae | *Orthetrum capicola* | No | LC | 10 |
| Anisoptera | Libellulidae | *Orthetrum chrysostigma* | No | LC | 10 |
| Anisoptera | Libellulidae | *Orthetrum hintzi* | No | LC | 1 |
| Anisoptera | Libellulidae | *Orthetrum machadoi* | No | LC | 1,7 |
| Anisoptera | Libellulidae | *Orthetrum rubens* | Yes | EN | 10 |
| Anisoptera | Libellulidae | *Orthetrum trinacria* | No | LC | 10 |
| Anisoptera | Libellulidae | *Palpopleura jucunda* | No | LC | 1,7 |
| Anisoptera | Libellulidae | *Pantala flavescens* | No | LC | 10 |
| Anisoptera | Libellulidae | *Rhyothemis semihyalina* | No | LC | 10 |
| Anisoptera | Libellulidae | *Tramea basilaris* | No | LC | 1,7,8 |
| Anisoptera | Libellulidae | *Tramea limbata* | No | LC | 10 |
| Anisoptera | Libellulidae | *Trithemis annulata* | No | LC | 10 |
| Anisoptera | Libellulidae | *Trithemis arteriosa* | No | LC | 10 |
| Anisoptera | Libellulidae | *Trithemis dorsalis* | No | LC | 1,7,8 |
| Anisoptera | Libellulidae | *Trithemis furva* | No | LC | 10 |
| Anisoptera | Libellulidae | *Trithemis kirbyi* | No | LC | 10 |
| Anisoptera | Libellulidae | *Trithemis palustris* | No | LC | 10 |
| Anisoptera | Libellulidae | *Trithemis stictica* | No | LC | 1,2,7,8 |
| Anisoptera | Libellulidae | *Zygonyx natalensis* | No | LC | 1,7,8 |
| Anisoptera | Libellulidae | *Zygonyx torridus* | No | LC | 10 |
| Anisoptera | Macromiidae | *Phyllomacromia contumax* | No | LC | 10 |
| Anisoptera | Macromiidae | *Phyllomacromia picta* | No | LC | 1,3,7,8,9 |
